# Supplementary material for: Phenotypic heterogeneity in mortality and prognosis of pulmonary alveolar proteinosis: a large-scale, global pooled analysis of individual-level data
Source: Springer Nature journal article supplement (doi:10.1186/s13023-025-03617-3), 2025-03-04

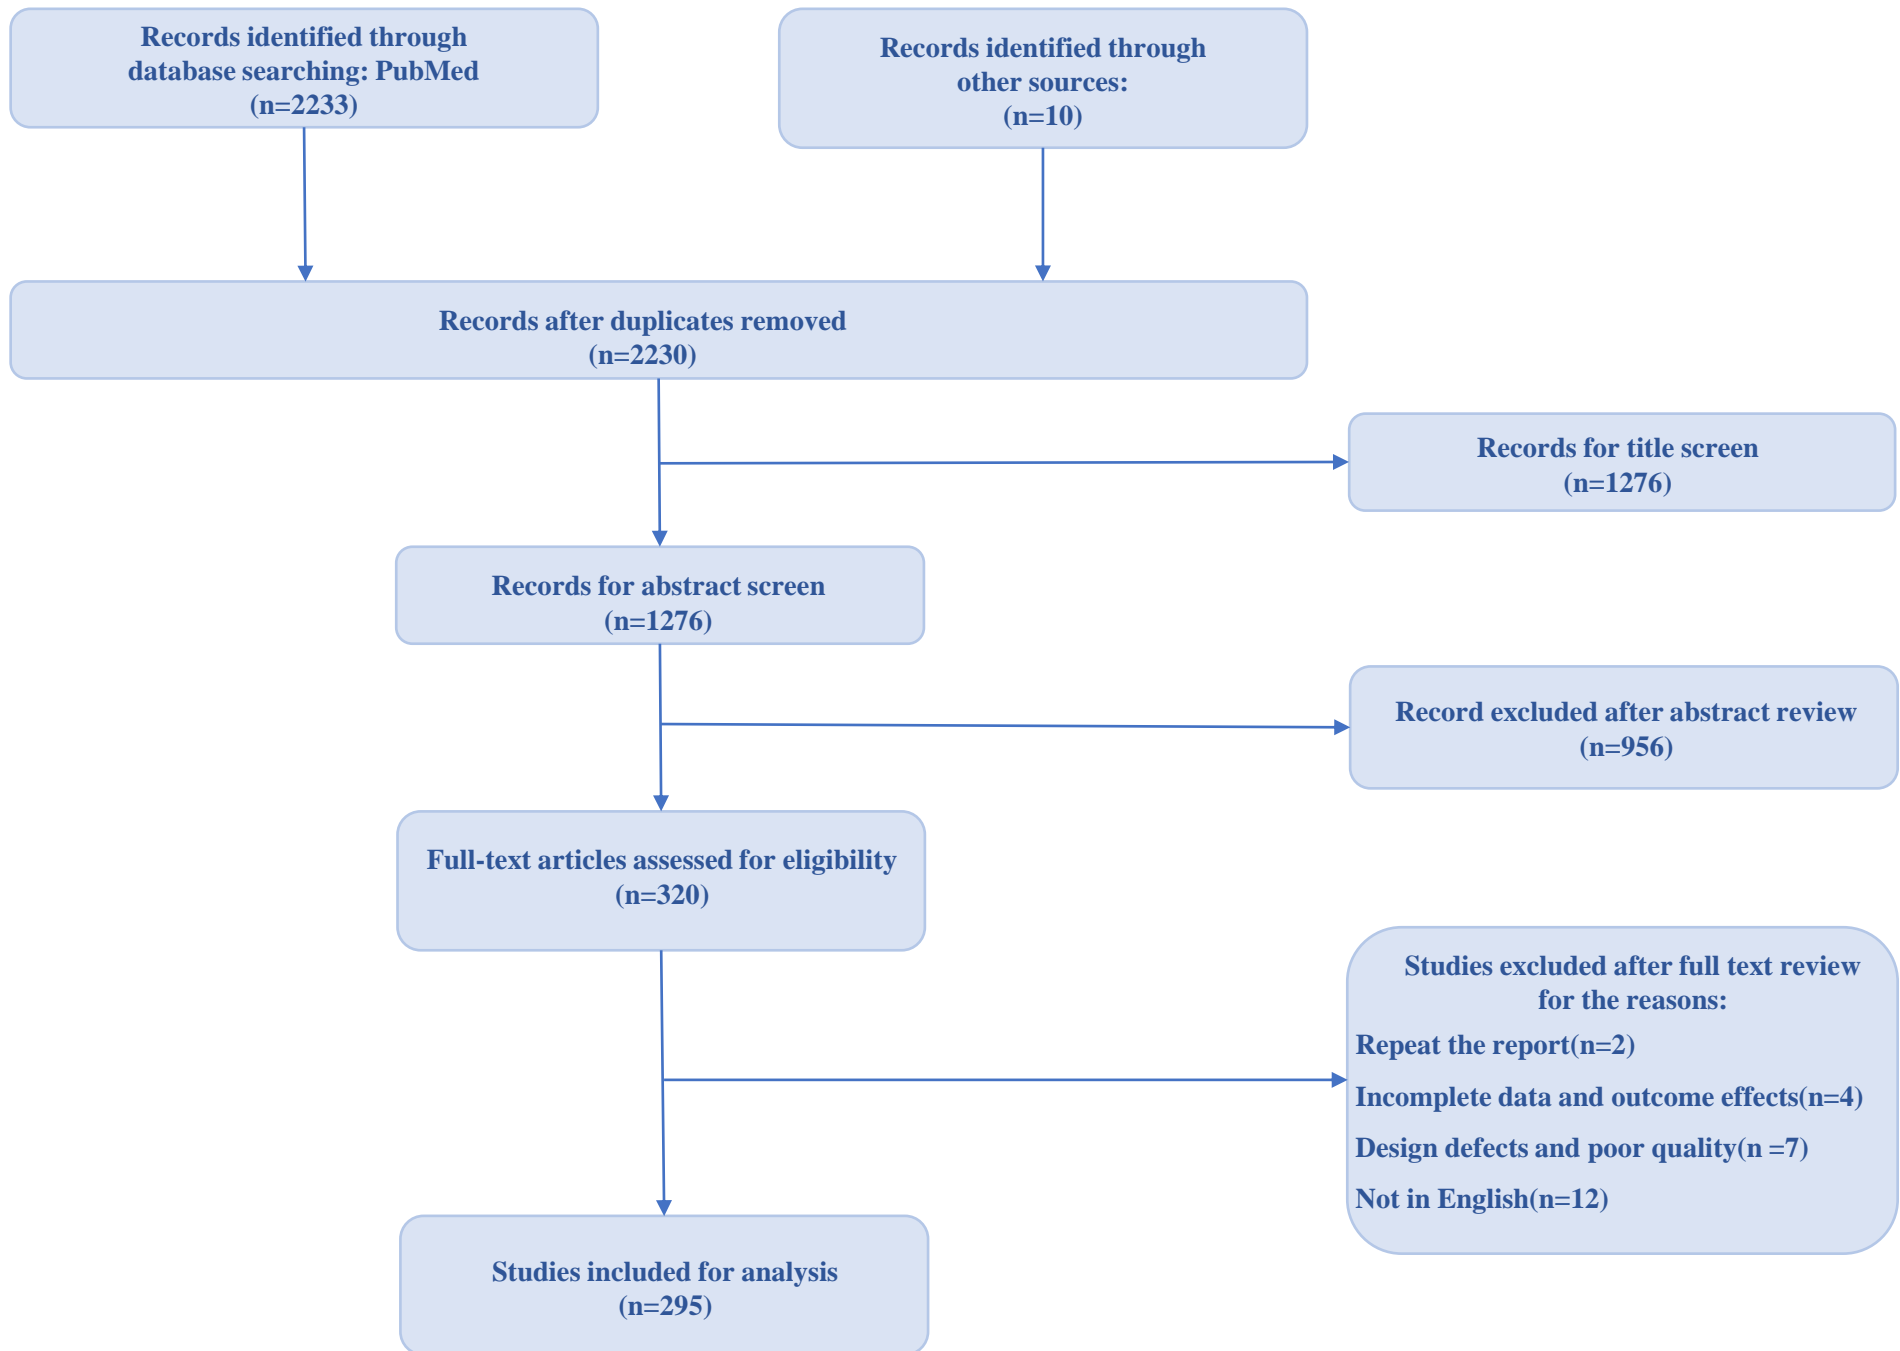

Supplement: MOESM13 [file 13023_2025_3617_MOESM13_ESM.pdf]
